1 **Characterising and Engaging a Computationally Defined Treatment Target for Depression**

2 Erdem Pulcu PhD<sup>1</sup> and Michael Browning MB.BS, DPhil<sup>1,2\*</sup>

3

4

5

6

7

8

9

10

11

12

13 <sup>1</sup> Department of Psychiatry, University of Oxford

14 <sup>2</sup> Oxford Health NHS Trust, Oxford

15 \*Corresponding Author:

16 Michael Browning, Dept. of Psychiatry, Warneford Hospital, Oxford, OX3 7JX.

17 Tel: +441865 223635

18 Fax: +441865 251076

19 michael.browning@psych.ox.ac.uk

20

Word Count:

Abstract: 250

Main Text: 3497

Figures: 4

Tables: 1

Supplementary Information: 1 File (including 6 Supplementary Figures and 1 Table)

21 **Abstract**

22 **Computational modelling of behaviour can identify neurocognitive processes which are not**  
23 **measurable using standard analyses and may thus be used to characterise novel psychiatric**  
24 **treatment targets. For example, computational work demonstrates that informative events, those**  
25 **which improve prediction of future outcomes, are preferentially processed. This suggests that the**  
26 **cognitive biases towards negative events which are causally associated with depression arise**  
27 **because patients overestimate how informative these events are. In this study we assess whether**  
28 **the estimated information content of positive relative to negative events is a viable treatment**  
29 **target, testing whether participants maintain separate valence specific estimates, whether altering**  
30 **the volatility of experienced outcomes modifies these estimates and their association with a**  
31 **physiological marker, central norepinepheric activity. 30 non-clinical participants completed a**  
32 **learning task in which choices led to both wins and losses. The information content of the**  
33 **outcomes was manipulated by varying their volatility. Computational modelling of participant**  
34 **choice was used to estimate learning rate and pupilometry data was collected as a measure of**  
35 **norepinepheric function. Participants independently altered the learning rates used for win and**  
36 **loss outcomes to reflect how informative the outcomes were. Pupil dilation was greater for**  
37 **informative than non-informative loss outcomes and was associated with participants' loss**  
38 **learning rate. These results characterise a computationally defined potential treatment target for**  
39 **depression. The target was associated with norepinepheric function and was engaged by**  
40 **modifying the volatility of experienced events. By identifying novel treatment targets**  
41 **computational approaches may spur the development of a new generation of psychiatric**  
42 **treatments.**

43

44

## 45 **Introduction**

46 Despite the range of pharmacological, psychological and physical interventions available for the  
47 treatment of major depressive disorder, remission rates are disappointingly low and relapse  
48 common<sup>1,2</sup>. There is thus a strong incentive to develop new, more effective treatments. A critical  
49 first step in the development of new treatments is the identification of novel treatment “targets”;  
50 causal processes which lead to depression and which may be modified by interventions.

51 Recently there has been increasing interest in applying computational techniques, such as the formal  
52 modelling of cognition and behaviour, to psychiatric problems<sup>3,4</sup>. These techniques allow the  
53 characterisation of cognitive processes which are difficult to measure using traditional analytic  
54 methods, raising the possibility that they may be used to identify novel, computationally defined  
55 treatment targets. In this paper we describe results which characterise a potential computational  
56 treatment target. We introduce the relevant conceptual background below, first describing the  
57 computational framework of the study and then linking this to the causal cognitive processes which  
58 underlie depression.

59 One of the insights provided by computational models of cognition is that individuals’ expectations  
60 are influenced more by those events which carry more information; that is, those events which  
61 improve predictions of future outcomes to a greater degree<sup>5-7</sup>. For example, imagine trying to learn  
62 what your colleagues think about your performance at work, based solely on their day-to-day  
63 feedback. One colleague compliments you about your work on 80% of the occasions you meet,  
64 never increasing or decreasing this frequency. In this case, each particular event (being  
65 complimented or not) provides little new information about what your colleague thinks about you,  
66 as you will always have an 80% chance of being complimented the next time you meet. In contrast, a  
67 second colleague’s appraisal of you seems to be more changeable, with periods when they  
68 compliment you regularly and others when you are rarely complimented at all. In this case each  
69 event provides more information; if you have recently been complimented by this colleague it is

70 more likely that their opinion of you is currently high and they will compliment you the next time  
71 you meet (Figure 1B). When learning what your colleagues currently think about you, you should be  
72 more influenced by whether the second, more volatile, colleague compliments you or not, because  
73 this provides more useful information than the behaviour of the stable colleague.

74 Within a reinforcement learning framework, the influence of events on one's belief is captured by  
75 the learning rate parameter, with a higher learning rate reflecting a greater influence of more  
76 recently experienced events<sup>8</sup>. Humans adjust their learning rate precisely as described above, using  
77 a higher learning rate for events, such as those occurring in a volatile context, which they estimate  
78 to be more informative<sup>5-7</sup>. The neural mechanism by which this modification of learning rate is  
79 achieved is thought to depend on activity of the central norepinepheric system<sup>9</sup>, with increased  
80 phasic activity of the system, which may be estimated using pupillometry<sup>10</sup>, reporting the occurrence  
81 of more informative events<sup>6,7</sup> and acting to enhance the cognitive processing of these events<sup>11</sup>.

82 Cognitive theories of depression propose that a tendency to preferentially process negative at the  
83 expense of positive events is causally related to the development and maintenance of symptoms<sup>12</sup>.  
84 For example, patients with depression attend to<sup>13</sup>, remember<sup>14</sup> and learn more from negative and  
85 less from positive events<sup>15</sup>. Consistent with the causal role of these negative biases, interventions  
86 designed to target and reduce them, such as cognitive behavioural therapy or more specific bias  
87 modification procedures can lead to improvement in symptoms<sup>16,17</sup>. However, relatively little work  
88 has explored why individuals might develop negative cognitive biases in the first place. One way of  
89 answering this question is to consider when negative biases might be the appropriate way to think  
90 about the world. The computational framework described above provides an overarching logic for  
91 when this might occur; individuals should bias their processing towards negative events if they  
92 estimate that these events are more informative than positive events.

93 This reformulation of the cognitive biases of depression in computational terms suggests a potential  
94 novel cognitive treatment target: the estimated information content of negative relative to positive

95 events. That is, if depressed patients are more influenced by negative events because they estimate  
96 the information content of these events to be higher than for positive events, an intervention which  
97 reduces this inflated estimated information content would be expected to reduce negative bias and  
98 thus improve symptoms of the illness.

99 In this paper we take a first step in assessing whether estimated information content is likely to be a  
100 viable treatment target in depression, by addressing three critical questions. Firstly, no previous  
101 study has demonstrated that humans maintain separate estimates of the information content of  
102 positive and negative events. We tested whether these estimates were maintained using a novel  
103 learning task (Figure 1) in which participant choice led to both positive and negative outcomes, with  
104 the volatility of the outcomes (and therefore their information content) being independently  
105 manipulated in separate task blocks. Secondly, we tested whether we could engage the target; that  
106 is, whether the volatility manipulation described above altered participants' estimated information  
107 content as reflected by the learning rates they used. Lastly, we assessed whether we could scaffold  
108 the behavioural assessment of participants' estimated information content with a physiological  
109 measure, activity of the central NE system, which we measured using pupillometry. We hypothesised  
110 that humans maintain separable estimates of the information content of positive and negative  
111 outcomes, that we could measure and manipulate these estimates using our task and that NE  
112 activity would track this cognitive process.

113

114

115 **Materials and Methods**

116 **Participants.** 30 English-speaking, individuals aged between 18 and 65 were recruited from the local  
117 community via advertisements. The number of participants recruited for the current cohort was  
118 selected to provide >95% power of detecting a similar effect size as that reported in a previous study  
119 in which a volatility manipulation was used to influence learning rate<sup>6</sup>. Participants who were  
120 currently on a psychotropic medication or who had a history of neurological disorders were excluded  
121 from the study.

122 **General procedure.** The study involved a single experimental session during which participants  
123 completed a novel learning task (described below) as well as standard questionnaire measures of  
124 depression (Quick Inventory of Depressive Symptoms, QIDS<sup>18</sup>) and anxiety (Spielberger State-Trait  
125 Anxiety Inventory, trait subscale, STAI<sup>19</sup>) symptoms. The study was approved by the University of  
126 Oxford Central Research Ethics Committee. Written informed consent was obtained from all  
127 participants, in accordance with the Declaration of Helsinki.

128 **The Information Bias Learning Task (IBLT).** The information bias learning task (Figure 1) was adapted  
129 from a structurally similar learning task previously reported in the literature<sup>5,6</sup>. On each trial of the  
130 task participants were presented with two abstract shapes (letters selected from the Agathodaimon  
131 font) and chose the shape which they believed would result in the best outcome. On each trial one  
132 of the shapes, if chosen, would result in a win of 15p and one would result in a loss of 15p. These  
133 two outcomes were independent of each other so that a particular shape could be associated with  
134 one, both or neither of the win and loss outcomes. Participants learned from the outcomes of  
135 previous trials the likely location of the win and the loss and therefore which was the most  
136 advantageous shape to choose on the current trial. Throughout the task the number and type of  
137 stimuli displayed during each phase of the trials was kept constant (Figure 1a) in order to minimise  
138 variations in luminance between trials.

139

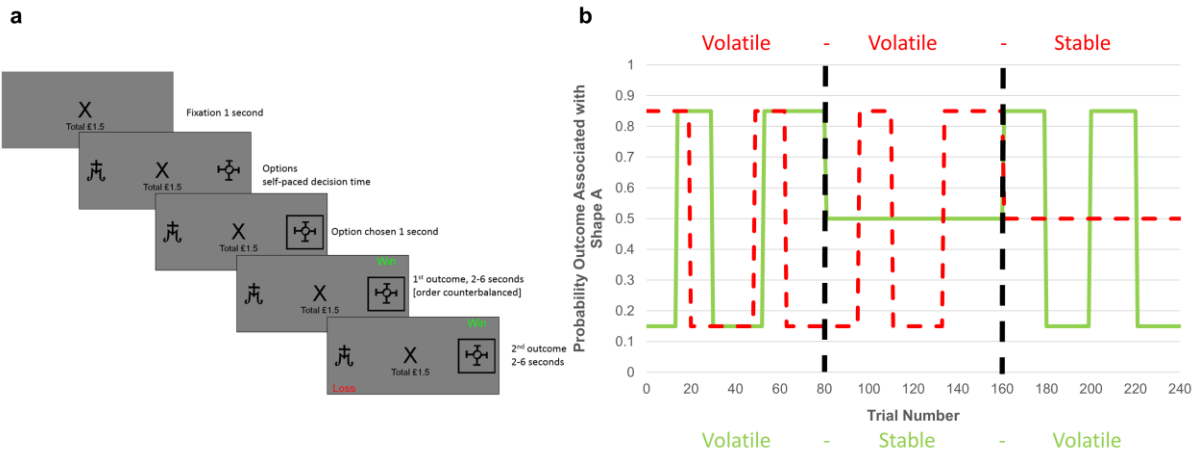

140

141 **Figure 1. Task structure (A) Timeline of one trial from the learning task used in this study.**  
142 **Participants are presented with two shapes (referred to as shape “A” and “B”) and have to choose**  
143 **one. On each trial, one of the two shapes will be associated with a “win” outcome (resulting in a**  
144 **win of 15p) and one with a “loss” outcome (resulting in a loss of 15p). Using trial and error**  
145 **participants learn where the win and loss are likely to be found and use this information to guide**  
146 **their choice. (B) Overall task structure. The task consisted of 3 blocks of 80 trials each (i.e. vertical,**  
147 **dashed, dark lines separate the blocks). The y-axis represents the probability,  $p$ , that an outcome**  
148 **(win in solid green or loss in dashed red) will be found under shape “A” (the probability that it is**  
149 **under shape “B” is  $1-p$ ). The blocks differ in how volatile (changeable) the outcome probabilities**  
150 **are. Within the first block both win and loss outcomes were volatile, in the second two blocks one**  
151 **outcome was volatile and the other stable (here wins are stable in the second block and losses**  
152 **stable in the third block). The volatility of the outcome influences how informative that outcome**  
153 **is. Consider the second block in which the losses are volatile and the wins stable. Here, regardless**  
154 **of whether the win is found under shape “A” or shape “B” on a trial, it will have the same chance**  
155 **of being under each shape in the following trials, so the position of a win in this block provides**  
156 **little information about the outcome of future trials. In contrast, if a loss is found under shape “A”,**  
157 **it is more likely to occur under this shape in future trials than if it is found under shape “B”. Thus,**  
158 **for the second block losses provide more information than wins and participants are expected to**  
159 **learn more from them.**

160

161 In total, the participants completed three blocks of 80 trials each, with a rest session between  
162 blocks. The same two shapes were used for all trials within a block, with different shapes being used  
163 between blocks. The outcome schedules were determined such that the probability that wins and  
164 losses were associated with shape A within a block always averaged 50%. In the volatile blocks the  
165 association between shape A and the outcome changed from 15 to 85% and back again in runs  
166 ranging from 14 to 30 trials. As described in the introduction, outcomes in the volatile blocks were  
167 more useful when predicting future outcomes, making them “informative”, whereas in the stable  
168 blocks outcome probabilities were fixed at 50%, making the outcomes “uninformative” in terms of

169 predicting future trials (Figure 1B). In the first block of the task, both outcomes were volatile  
170 (informative), whereas in blocks 2 and 3 only one of the outcomes was volatile (informative) with  
171 the other being stable (uninformative). See supplementary materials for results from a control task  
172 in which volatility was kept constant, while the strength of the association between stimuli and  
173 outcomes was varied. The order in which blocks 2 and 3 were completed was counterbalanced  
174 across participants. Participants were paid all the money they had collected in the task, in addition  
175 to a £10 baseline payment. Choice data from the task was analysed by fitting a behavioural model  
176 consisting of a Rescorla-Wagner learning rule with separate learning rates for win and loss outcomes  
177 coupled to a softmax action selector which incorporated separate inverse temperatures terms for  
178 wins and losses<sup>5,6</sup>. This and alternative models, as well as the procedure used to estimate model  
179 parameters, are described in detail in the supplementary methods.

180 **Pupilometry Data.** Full details of the preprocessing of the pupilometry data is provided in the  
181 supplementary methods. Preprocessing resulted in difference timeseries of pupil dilation data which  
182 represented the differential pupil dilation occurring during trials when the outcome (win or loss) was  
183 received relative to when it was not received over the six seconds after presentation of the  
184 outcomes. These timeseries were binned into 1 second bins to facilitate analysis.

185 **Data Analysis.** Parameters derived from the computational models were transformed before  
186 analysis so that they were on the infinite real line (an inverse logit transform was used for learning  
187 rates and a log transform for inverse temperatures). Figures illustrate non-transformed parameters  
188 for ease of interpretation. The effect of the volatility manipulation on these transformed parameters  
189 was tested using a repeated measures ANOVA of data derived from the last two task blocks (i.e.  
190 when volatility was manipulated). In this ANOVA block information (win volatile block, loss volatile  
191 block) and parameter valence (wins, losses) were within subject factors and block order (win volatile  
192 first, loss volatile first) was a between subject factor. The critical term of this analysis is the block



193 volatility x parameter valence interaction which tests for a differential effect of the volatility  
194 manipulation on the win and loss parameters.

195 The binned pupil timeseries data was analysed using a repeated measures ANOVA with time bin (1-6  
196 seconds), block type (win volatile, loss volatile) and valence (wins, losses) as within subject factors  
197 and block order as a between subject factor. Again a block type x valence interaction tests for a  
198 differential effect of the volatility manipulation on the pupil dilation in response to wins vs. losses. In  
199 order to perform between subject correlations of the pupilometry data the mean relative dilation  
200 across the entire six second outcome period was also calculated for each participant and each block.  
201 In all analyses significant interactions were followed up by standard post-hoc tests.

202

203 **Results**

204 Participant demographic details are reported in Table 1.

205 **Table 1. Demographic details of participants**

| Measure    | Mean (SD)     |
|------------|---------------|
| Age        | 30.52 (9.51)  |
| Gender     | 76% Female    |
| QIDS-16    | 5.03 (3.95)   |
| Trait-STAI | 35.79 (10.63) |

206

207 **QIDS-16; Quick Inventory of Depressive Symptoms, 16 item self-report version. Trait-STAI;**  
208 **Speilberger State-Trait Anxiety Inventory, trait form.**

209

210 *Effect of Volatility Manipulation on Learning Parameters*

211 As predicted, participants' learning rates for positive and negative outcomes reflected the  
212 information content of the outcomes in the IBLT (block information x parameter valence;  $F(2,27)$   
213  $=26.488, p < 0.001$ ; Figure 2). Specifically, learning rates were higher for win ( $F(1,27) = 16.59, p$   
214  $< 0.001$ ) and loss ( $F(1,27) = 16.02, p < 0.001$ ) outcomes when they were volatile (informative) than  
215 when they were stable (not informative). Similarly the learning rate for wins was higher than that for  
216 losses when wins were more volatile than losses ( $F(1,27) = 23.958, p < 0.001$ ) and the learning rate for  
217 losses was higher than for wins when losses were more volatile ( $F(1,27) = 6.793, p < 0.015$ ). These  
218 results demonstrate that participants maintain independent estimates of the information content of  
219 positive and negative outcomes and that it is possible to alter these estimates using a simple  
220 volatility manipulation. In contrast to the effects on learning rate there were no significant effects of  
221 the task on the inverse temperature parameter of the learning model ( $F(1,27) = 0.038, p = 0.846$ )  
222 indicating that, as intended, the volatility manipulation specifically altered learning rate rather than

223 the relative weights placed on positive and negative outcomes<sup>20</sup>. See the Supplementary Materials  
224 for additional analysis of the behavioural results as well as an additional control experiment.

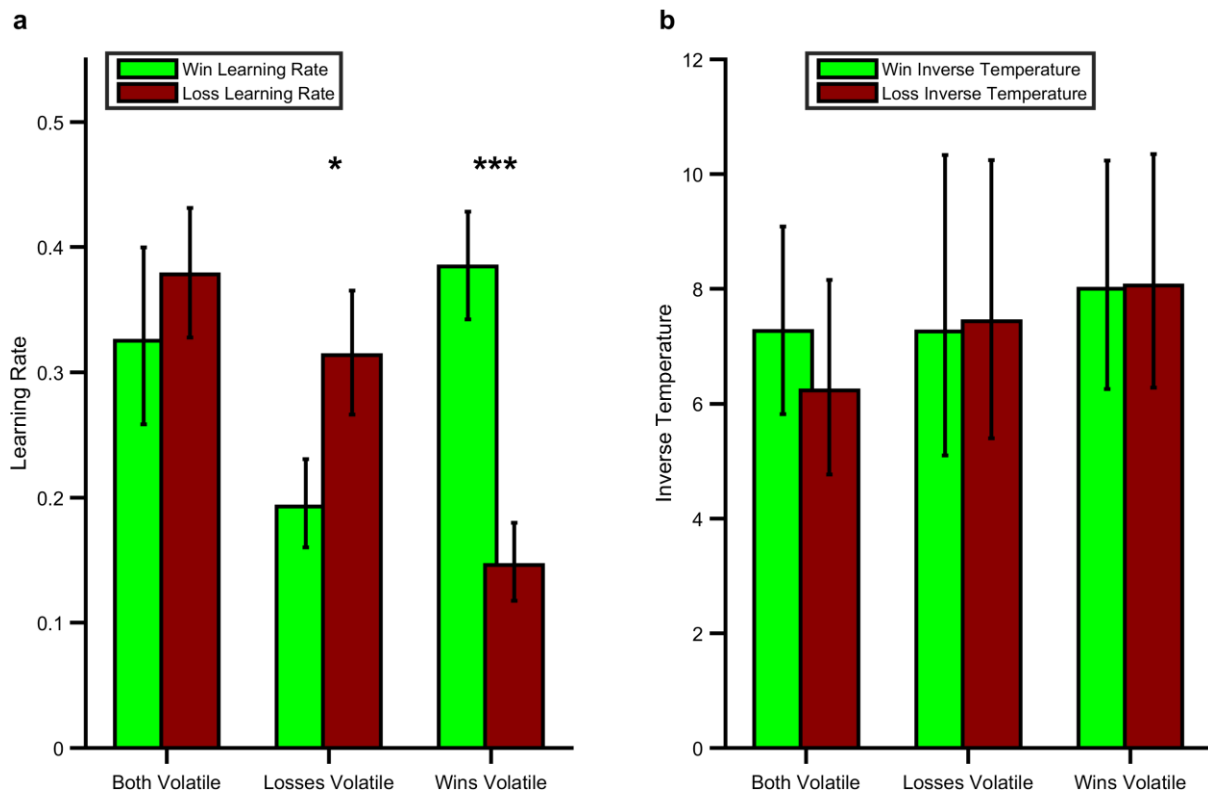

225

226 **Figure 2. Effect of Volatility Manipulation on Participant Behaviour. (A) Mean (SEM) learning rates**  
227 **for each block of the IBLT. As can be seen the win learning rates (light green bars) and loss learning**  
228 **rate (dark red bars) varied independently as a function of the volatility of the relevant outcome**  
229 **( $F(1,27)=26.488$ ,  $p<0.001$ ), with a higher learning rate being used when the outcome was volatile**  
230 **than stable (\*  $p<0.05$ , \*\*\*  $p<0.001$  for pairwise comparisons). (B) No effect of volatility was**  
231 **observed for the inverse temperature parameters ( $F(1,27)=0.038$ ,  $p=0.846$ ).**

232

### 233 *Effect of Volatility Manipulation on Pupil Dilation*

234 Next, we investigated the extent to which central NE activity, as estimated using pupilometry, was  
235 related to the information content of positive and negative outcomes in the IBLT. Consistent with  
236 the behavioural findings a significant interaction between block information and outcome valence  
237 was found for the degree to which participants' pupils dilated in response to outcome receipt (Figure  
238 3;  $F(1,27)=4.9$ ;  $p=0.04$ ). In other words, participants' pupils dilated more on receipt of an outcome  
239 when that outcome was volatile (informative) than when it was stable (not informative). This effect

240 was not further modified by the time bin following outcome (block information x outcome valence x  
241 time;  $F(5,135)=0.340$ ,  $p=0.565$ ). Analysing the positive and negative outcomes separately indicated  
242 that the effect of block volatility was significant for the loss outcomes ( $F(1,27)=7.597$ ,  $p = 0.01$ ), but  
243 not for the win outcomes ( $F(1,27)=0.157$ ,  $p = 0.695$ ).

244

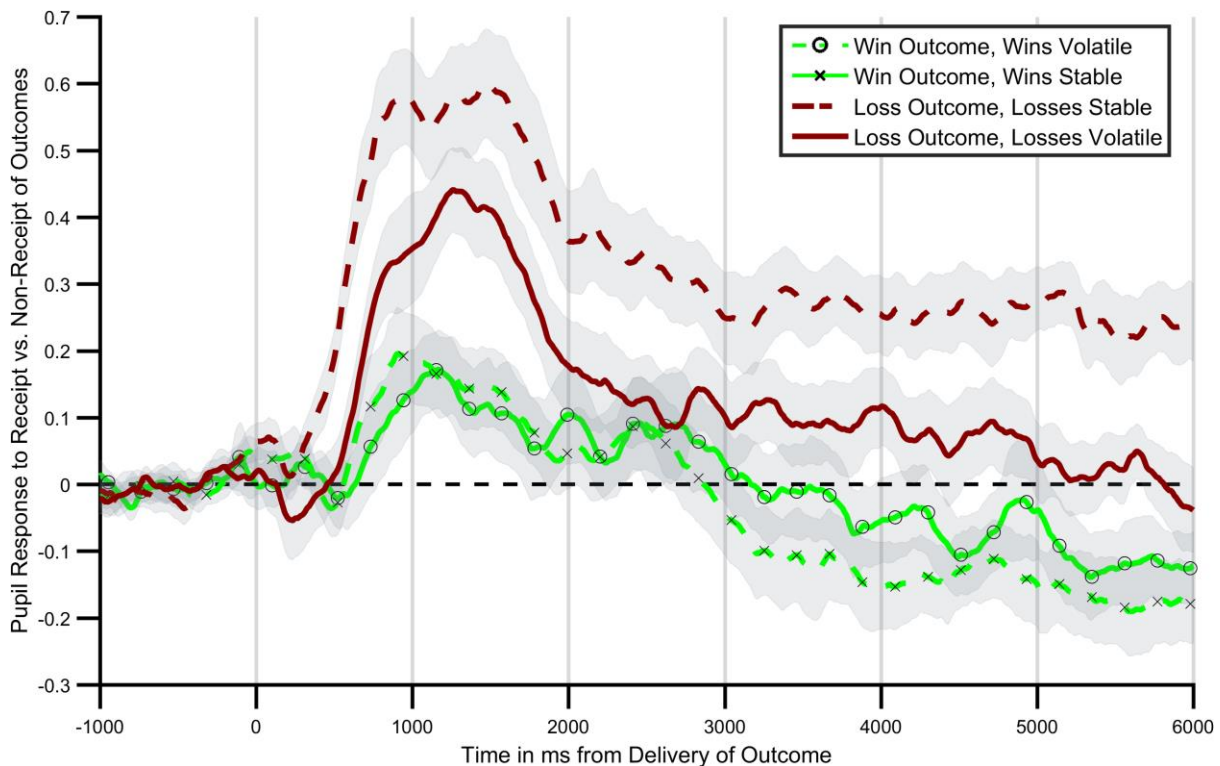

245

246 **Figure 3. Pupil response to outcome delivery during the IBLT. Lines illustrate the mean pupil**  
247 **dilation to the receipt relative to non-receipt of an outcome across the 6 seconds after outcomes**  
248 **are presented. Light green lines (with crosses and circles) report response to win outcomes, dark**  
249 **red lines report response to loss outcomes. Solid lines report blocks in which the wins were more**  
250 **informative (volatile), dashed lines blocks in which losses were more informative. As can be seen**  
251 **pupils dilated more when the relevant outcome was more informative, with this effect being**  
252 **particularly marked for loss outcomes. Shaded regions represent the SEM.**

253

### 254 *Relationship Between Choice Behaviour and Pupil Dilation*

255 As central NE activity is thought to mediate the effect of outcome information content on  
256 participant choice<sup>9</sup>, there should be a relationship between how much a participant's pupils  
257 differentially dilate in response to an outcome during the informative and non-informative blocks

258 and the degree to which that participant adjusts their learning rate between blocks for the same  
259 outcome. We tested this by assessing the correlation between the change in mean pupil response  
260 between blocks and the change in behaviourally estimated learning rates, separately for wins and  
261 losses. As can be seen (Figure 4) the change in pupil response to loss outcomes between blocks was  
262 significantly correlated with the change in loss learning rate ( $r(28)=0.5, p=0.009$ ) but pupil response  
263 to win outcomes was not correlated with change in win learning rate ( $r(28)=-0.08, p=0.7$ ).

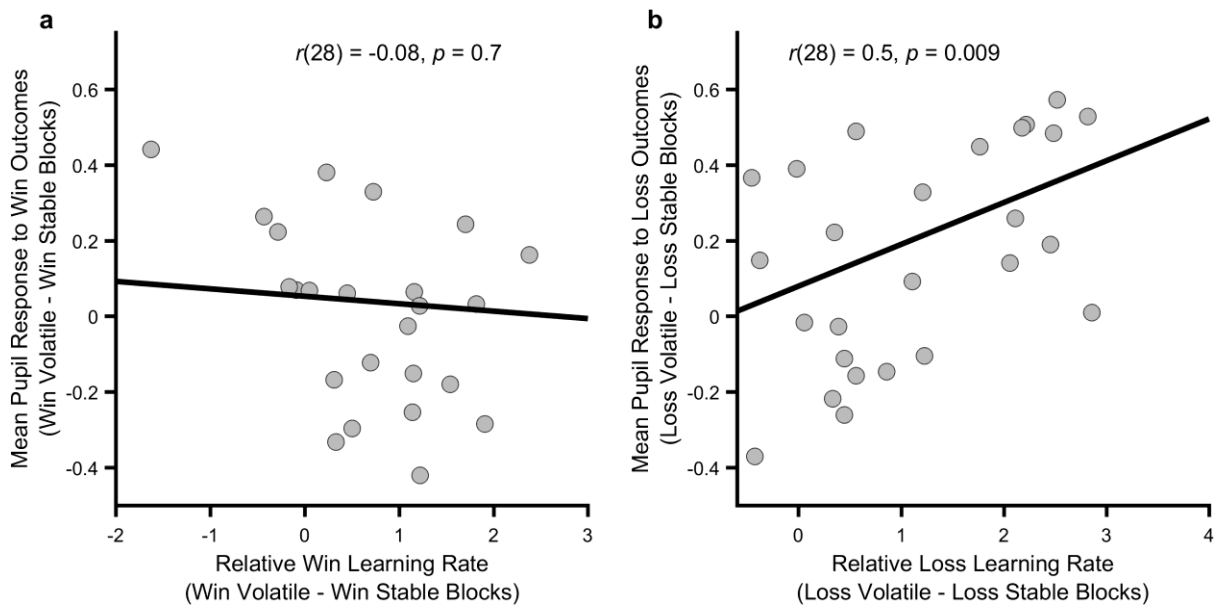

264

265 **Figure 4. Relationship between behavioural and physiological measures. The more an individual**  
266 **altered their loss learning rate between blocks, the more that individual's pupil dilation in**  
267 **response to loss outcomes differed between the blocks (panel b;  $p=0.009$ ), however no such**  
268 **relationship was observed for the win outcomes (panel a;  $p=0.7$ ). Note that learning rates are**  
269 **transformed onto the real line using an inverse logit transform before their difference is calculated**  
270 **and thus the difference score may be greater than  $\pm 1$ .**

271

272

## 273 **Discussion**

274 Humans adapt the degree to which they are influenced by positive and negative outcomes in  
275 response to how informative they estimate those outcomes to be. These estimates may represent a  
276 novel, computationally defined cognitive treatment target for depression. In this study we  
277 demonstrated that participants maintain independent estimates of how informative positive and  
278 negative outcomes are and use these estimates to control how much the outcomes influence their  
279 choices. We also demonstrated that the putative treatment target, the estimated information  
280 content of the outcomes, may be engaged using a simple cognitive intervention, such as the  
281 volatility manipulation used in the current paper. A physiological measure of central NE activity was  
282 associated with the target process, although this was only seen for loss outcomes.

283 Previous work has demonstrated that humans adapt their learning in response to subtle statistical  
284 aspects of the environment, such as employing an increased learning rate in volatile, or changeable,  
285 contexts<sup>5-7</sup>. This suggests that learners maintain an estimate of how useful, or informative, an event  
286 is and learn more from events they estimate to be more informative. The current study extends this  
287 work by providing evidence that humans are able to maintain independent estimates of the  
288 information content of different classes of event, in this case positive and negative outcomes  
289 (winning vs. losing money). The parallel representation of estimated information content of wins and  
290 losses provides a mechanism by which individuals may come to be generally more influenced by  
291 events of one class than another. In the case of depression, patients have been shown to be more  
292 influenced by negative events, for example tending to remember more negative than positive  
293 events<sup>14</sup>, attend to negative more than positive events<sup>13</sup> and learn more from negative and less from  
294 positive outcomes<sup>15</sup>. The results of the current study suggest<sup>1</sup> that these observed negative biases  
295 may all be understood as a consequence of patients estimating that the information content of  
296 negative relative to positive events was higher than non-patients. As the negative biases described  
297 above are believed to be causally related to symptoms of depression<sup>12</sup>, and interventions designed

298 to alter negative biases can reduce symptoms<sup>16,17</sup>, these results raise the possibility that novel  
299 interventions which target expected information content may act to reduce symptoms of the illness.  
300 Of course, the current paper which identifies a potential computational target and a method for  
301 engaging that target is only the first step in the development of new treatments. The next step,  
302 analogous to a phase 2a study in drug development<sup>21</sup>, is to assess the initial efficacy of an  
303 intervention which engages the target in a clinical population. A study designed to do just that is  
304 currently underway (study identifier NCT02913898).

305 A particular advantage of computational approaches in psychiatry is that formal models are often  
306 useful when linking together different levels of observation, such as participant behaviour to the  
307 underlying neurochemistry which produces that behaviour<sup>22</sup>. In the current study we investigated  
308 the link between the learning rate used by participants, which provides a behavioural index of how  
309 informative they estimate an outcome to be, and pupil dilation which has been shown to correlate  
310 with central norepinepheric activity<sup>10</sup>. Pupil dilation in response to outcome receipt differed as a  
311 function of the information content of the outcome, although this was only significant for losses.  
312 Specifically, when losses were informative, the difference in pupil dilation between trials in which a  
313 loss was received and when it was not received was greater than when the losses were not  
314 informative. This result is similar to previously reported findings of an increased pupil response to  
315 stimuli in a volatile context<sup>6,7</sup>, although these earlier studies reported a general increase in pupil  
316 dilation rather than a dilation conditioned on receipt of an outcome. A possible explanation of this  
317 difference is that, in the current study, one of the outcomes (win or loss) was always volatile and  
318 presentation order of the outcomes was randomised. Therefore, in contrast to the previous studies  
319 in which only one class of outcome was used, the estimated volatility in the current study was  
320 dependent on the outcome presented and thus modified response to that outcome only. This  
321 observation may also explain why the pupillometry measure was sensitive only to loss and not win  
322 outcomes; receipt of a loss lead to a greater pupil dilation overall than a win (see Sup Figure 6) and

323 thus the effect of estimated outcome information, which modifies the relative dilation observed  
324 when an outcome is received, may be less apparent for wins.

325 The pupilometry measure included in the current study raises the possibility that estimated  
326 information content may be influenced by pharmacological as well as cognitive interventions. Pupil  
327 size is influenced by activity of the central norepinephrine system<sup>10</sup> and previous work exploring the  
328 neural systems which control response to volatility also predict a key role for this system<sup>9</sup> suggesting  
329 it as an obvious pharmacological target. A single study has reported an effect of atomoxetine, a  
330 norepinephrine reuptake inhibitor, on learning in a volatile environment<sup>23</sup> although no previous  
331 work has examined the effect of a pharmacological intervention on learning to positive vs. negative  
332 outcomes. It would be interesting to test whether a pharmacological manipulation of norepinepheric  
333 function was able to modify the outcome specific volatility effect demonstrated in this paper as such  
334 an effect may indicate a clinically useful interaction between pharmacological and cognitive  
335 interventions.

336 The information content of an outcome is not solely a function of the volatility of its occurrence.  
337 Other factors, such as the strength of the association between a stimulus, or action, and the  
338 subsequent outcome, sometimes called the “expected uncertainty”<sup>9</sup> of the association, will also  
339 influence how informative the outcome is. Outcomes in the IBLT task differ in terms of both volatility  
340 and expected uncertainty, with both of these factors predicted to influence learning rate in the same  
341 direction (i.e. both factors should increase learning rate in the volatile blocks). A control experiment  
342 (see supplementary materials) suggested that the current findings were likely to be due to the  
343 effects of volatility rather than expected uncertainty on learning. However, it would be interesting in  
344 future studies to test whether it was possible to use manipulations of expected uncertainty, in the  
345 same way that volatility is used in this study, to induce a preference for positive over negative  
346 events. This may provide an alternative approach to engaging and altering expected information  
347 content than the volatility based effect reported here.



348 The current study demonstrated that human learners maintain separable estimates of the  
349 information content of positive and negative outcomes and provides an initial proof of principle as  
350 to how these estimates may be modified. The study illustrates a potentially exciting application of  
351 computational techniques in psychiatry; they may be used to identify novel treatment targets and by  
352 so doing spur the development of new and more effective treatments.

### 353 **Funding and Disclosures**

354 This study was funded by a MRC Clinician Scientist Fellowship awarded to MB (MR/N008103/1). MB  
355 has received travel expenses from Lundbeck for attending conferences. EP declares no potential  
356 conflict of interest.

357

358

## 359 References

- 360 1 Casacalenda N, Perry JC, Looper K. Remission in major depressive disorder: a comparison of  
361 pharmacotherapy, psychotherapy, and control conditions. *Am J Psychiatry* 2002; **159**: 1354–  
362 1360.
- 363 2 Rush MD A. STAR\*D: What Have We Learned? *Am J Psychiatry* 2007; **164**: 201–204.
- 364 3 Redish, A. D., Gordon, J. A. (eds.). *Computational Psychiatry. New Perspectives on Mental Illness*.  
365 MIT Press, 2016.
- 366 4 Paulus MP, Huys QJM, Maia TV. A Roadmap for the Development of Applied Computational  
367 Psychiatry. *Biol Psychiatry Cogn Neurosci Neuroimaging* 2016; **1**: 386–392.
- 368 5 Behrens TEJ, Woolrich MW, Walton ME, Rushworth MFS. Learning the value of information in an  
369 uncertain world. *Nat Neurosci* 2007; **10**: 1214–1221.
- 370 6 Browning M, Behrens TE, Jochem G, O'Reilly JX, Bishop SJ. Anxious individuals have difficulty  
371 learning the causal statistics of aversive environments. *Nat Neurosci* 2015; **18**: 590–596.
- 372 7 Nassar MR, Rumsey KM, Wilson RC, Parikh K, Heasley B, Gold JI. Rational regulation of learning  
373 dynamics by pupil-linked arousal systems. *Nat Neurosci* 2012; **15**: 1040–1046.
- 374 8 Sutton R, Barto AG. *Reinforcement Learning*. MIT Press: Cambridge, Massachusetts, 1998.
- 375 9 Yu AJ, Dayan P. Uncertainty, neuromodulation, and attention. *Neuron* 2005; **46**: 681–92.
- 376 10 Joshi S, Li Y, Kalwani RM, Gold JI. Relationships between Pupil Diameter and Neuronal Activity in  
377 the Locus Coeruleus, Colliculi, and Cingulate Cortex. *Neuron* 2016; **89**: 221–234.
- 378 11 Aston-Jones G, Cohen JD. An integrative theory of locus coeruleus-norepinephrine function:  
379 adaptive gain and optimal performance. *Annu Rev Neurosci* 2005; **28**: 403–450.
- 380 12 Mathews A, MacLeod C. Cognitive vulnerability to emotional disorders. *Annu Rev Clin Psychol*  
381 2005; **1**: 167–195.
- 382 13 Gotlib IH, Krasnoperova E, Yue DN, Joormann J. Attentional biases for negative interpersonal  
383 stimuli in clinical depression. *J Abnorm Psychol* 2004; **113**: 127–135.
- 384 14 Bradley BP, Mogg K, Williams R. Implicit and explicit memory for emotion-congruent information  
385 in clinical depression and anxiety. *Behav Res Ther* 1995; **33**: 755–770.
- 386 15 Eshel N, Roiser JP. Reward and punishment processing in depression. *Biol Psychiatry* 2010; **68**:  
387 118–124.
- 388 16 NICE. Treatment and management of depression in adults, including adults with a chronic  
389 physical health problem. NICE: London, 2009.
- 390 17 Browning M, Holmes EA, Charles M, Cowen PJ, Harmer CJ. Using attentional bias modification as  
391 a cognitive vaccine against depression. *Biol Psychiatry* 2012; **72**: 572–579.
- 392 18 Rush AJ, Trivedi MH, Ibrahim HM, Carmody TJ, Arnow B, Klein DN *et al*. The 16-Item Quick  
393 Inventory of Depressive Symptomatology (QIDS), clinician rating (QIDS-C), and self-report (QIDS-

- 394 SR): a psychometric evaluation in patients with chronic major depression. *Biol Psychiatry* 2003;  
395 **54**: 573–583.
- 396 19 Spielberger CD, Gorsuch RL, Lushene RD. *Manual for the State-Trait Anxiety Inventory (STAI)*.  
397 Consulting Psychologists Press.: Palo Alto, CA, 1983.
- 398 20 Huys QJ, Pizzagalli DA, Bogdan R, Dayan P. Mapping anhedonia onto reinforcement learning: a  
399 behavioural meta-analysis. *Biol Mood Anxiety Disord* 2013; **3**: 12.
- 400 21 Ciociola AA, Cohen LB, Kulkarni P, Kefalas C, Buchman A, Burke C *et al*. How Drugs are Developed  
401 and Approved by the FDA: Current Process and Future Directions. *Am J Gastroenterol* 2014; **109**:  
402 620–623.
- 403 22 Corlett PR, Fletcher PC. Computational psychiatry: a Rosetta Stone linking the brain to mental  
404 illness. *Lancet Psychiatry* 2014; **1**: 399–402.
- 405 23 Jepma M, Murphy PR, Nassar MR, Rangel-Gomez M, Meeter M, Nieuwenhuis S.  
406 Catecholaminergic Regulation of Learning Rate in a Dynamic Environment. *PLoS Comput Biol*  
407 2016; **12**: e1005171.
- 408
- 409
- 410
- 411
- 412
- 413
- 414
- 415
- 416
- 417
- 418
- 419
- 420

## 421 **Supplementary Methods**

### 422 *Further Details of the IBLT*

423 The task was presented on a VGA monitor connected to a laptop computer running Presentation  
424 software version 18.3 (Neurobehavioural Systems). Participants' heads were stabilised using a head-  
425 and-chin rest placed 70 cm from the screen on which an eye tracking system was mounted (Eyelink  
426 1000 Plus; SR Research). The eye tracking device was configured to record the coordinates of both of  
427 the eyes and pupil area at a rate of 500 Hz. The abstract shapes of the learning task were drawn on  
428 either side of a fixation cross which marked the middle of the screen and were offset by around 7°  
429 visual angle. The two outcomes (win and loss) were displayed on the screen in randomised order for  
430 a jittered interval of 2-6 (mean 4) seconds. Auditory stimuli lasting 0.7 seconds were played when  
431 participants received a win ("chi-ching" sound) or loss (error buzz). Participants' accumulated total  
432 winnings was displayed under the fixation cross and was updated based at the beginning of the  
433 subsequent trial.

### 434 *Preprocessing of Pupil Data*

435 Blinks were identified using the Eyelink system's built in filter and were then removed from the data.  
436 Missing data points (including blinks) were linearly interpolated. The resulting trace was subjected to  
437 a low pass Butterworth filter with a cut-off of 3.75 Hz and then z transformed across the session<sup>5,6</sup>.  
438 The pupil response to the win and the loss outcomes were extracted separately from each trial,  
439 using a time window based on the presentation of the outcomes. This included a 1-s baseline period  
440 before the presentation of the outcome, and a 6-s period following outcome presentation. Baseline  
441 correction was performed by subtracting the mean pupil size during the 1 second baseline period  
442 prior to the presentation of each outcome, from each time point in the post outcome period.  
443 Individual trials were excluded from the pupilometry analysis if more than 50% of the data from the  
444 outcome period had been interpolated (mean =7% of trials)<sup>5</sup>. One participant was excluded from  
445 the pupilometry analysis as more than 99% of their trials were excluded on this basis. The first 10  
446 trials from each block were not used in the analysis as initial pupil adaption can occur in response to  
447 luminance changes in this period<sup>5,6</sup>. The preprocessing resulted in two sets of timeseries per  
448 participant, one set containing pupil dilation data for each included trial when the win outcomes  
449 were displayed and the other when the loss outcomes were displayed. A difference timeseries,  
450 calculated as the mean pupil response to the receipt vs. non-receipt of the outcome in each block  
451 was then calculated (See below for a complementary regression analysis of this data). In order to  
452 statistically compare these timeseries the mean of each 1 second time bin after outcome  
453 presentation was calculated.

454 *Behavioural Model Used in Analysis of the IBLT*

455 The primary measure of interest in the IBLT is the learning rate for wins and for losses in each of the  
456 three blocks. A simple behavioural model, based on that employed in related tasks<sup>4,5</sup> was used to  
457 estimate learning rate. This model first estimated the separate probabilities that the win and loss  
458 would be associated with shape “A” using a Rescorla-Wagner learning rule<sup>19</sup>:

459 
$$rwin_{(i+1)} = rwin_{(i)} + \alpha win * (winout_{(i)} - rwin_{(i)})$$

460 
$$rloss_{(i+1)} = rloss_{(i)} + \alpha loss * (lossout_{(i)} - rloss_{(i)})$$

461 In these equations  $rwin_{(i)}$ , which was initialised at 0.5, is the estimated probability that the win will  
462 be associated with shape “A” on trial i (NB the probability that the win is associated with shape “B” is  
463  $1-rwin_{(i)}$ ),  $winout_{(i)}$  is a variable coding for whether the win was associated with shape “A” (in  
464 which case the variable has a value of 1) or shape “B” (giving a value of 0) and  $\alpha win$  is a free  
465 parameter, the learning rate for the wins.  $rloss_{(i)}$ ,  $lossout_{(i)}$  and  $\alpha loss$  are the same variables for  
466 the loss outcome. These estimated outcome probabilities were then transformed into a single  
467 choice probability using a soft max function:

468 
$$PchoiceA_{(i)} = \frac{1}{1 + \exp^{-(\beta win * rwin_{(i)} - \beta loss * rloss_{(i)})}}$$

469 Where  $PchoiceA_{(i)}$  is the probability of choosing shape “A” on trial i, and  $\beta win$  and  $\beta loss$  are  
470 inverse decision temperatures for wins and losses, respectively. The four free-parameters of this  
471 model (learning rates and inverse temperatures for wins and losses) were estimated separately for  
472 each task block and each participant by calculating the full joint posterior probability of the  
473 parameters, given participants’ choices, and then deriving the expected value of each parameter  
474 from their marginalised probability distributions<sup>4,5</sup>. Choice data from the first 10 trials of each block  
475 was not used when estimating the parameters as these trials were excluded from the pupil analysis  
476 (due to initial pupil adaption)<sup>5,6</sup>. Data on alternative behavioural models and model fits can be found  
477 in the next section.

478

479 *Alternative Behavioural Models and Model Selection*

480 The behavioural model used in this study (Referred to as model 1 below) was developed based on  
481 the models used in previous studies in which volatility is manipulated<sup>1-3</sup> and to allow for the  
482 possibility that differential behaviour in response to win and loss outcomes may have arisen due to  
483 changes in learning rate (captured using separate win and loss learning rates) or outcome sensitivity

484 (captured using separate inverse temperature parameters). However, it is possible that this model  
485 does not provide the best fit to participant choice data. In order to assess this possibility we  
486 compared the fit of this model against a range of comparator models using the Bayesian Information  
487 Criteria (BIC) metric, which includes a penalty term for model complexity.

488 Model 2: It is possible for participants to perform our task without learning the independent  
489 probability of the win and loss outcomes, but rather by taking a model-free<sup>4</sup> approach in which the  
490 overall value of each shape was learned.

$$491 \quad v^A_{(i+1)} = v^A_{(i)} + \alpha value * (out_{(i)} - (rwin_{(i)} - rloss_{(i)}))$$

492 Here the value of shape A ( $v^A$ ) initiates at 0 on trial 1, and is updated on every trial based on the joint  
493 outcome (i.e. the win – loss for that shape) of the trial ( $out_{(i)}$ ), which can be -1, 0 or 1 with a single  
494 learning rate ( $\alpha value$ ). The estimated relative values of the 2 shapes were then transformed into a  
495 choice probability using a softmax function with a single inverse temperature parameter.

496 Model 3: An alternative approach, described by Behrens and colleagues<sup>2</sup> estimates trialwise volatility  
497 within a fully Bayesian framework. For this model we used Behrens' Bayesian learner to  
498 independently estimate the expected probabilities of the win and loss outcomes during the task  
499 (note that there are no free parameters for this learner). These estimates were then combined  
500 using the same selector model described in the main text with two inverse temperature parameters.

501 Model 4: This was a slightly simpler version of Model 1 in that it employed only a single inverse  
502 temperature parameter allowing assessment of the degree to which using 2 such parameters  
503 influenced model fit.

504 Model 5: Finally, we tested a slightly more complex version of Model 4 by including a risk parameter  
505  $\gamma$ , as used in previous studies, which modulates the estimated probabilities of wins and losses in a  
506 non-linear way. Risk parameters have been shown to account for non-normative aspects of human  
507 choice, particularly when outcome probabilities are particularly high or low:

$$508 \quad r\tilde{win}_{(i)} = 2^{-(-\log_2(rwin_{(i)}))^{\gamma}}$$
$$r\tilde{loss}_{(i)} = 2^{-(-\log_2(rloss_{(i)}))^{\gamma}}$$

509

510 A summary of the five models can be found in Supplementary Table 1 below:

511

512 **Table S1: Description of Comparator Models**

| Model Name | Number of Learning Rate Parameters | Number of Inverse Temperature Parameters | Notes                            |
|------------|------------------------------------|------------------------------------------|----------------------------------|
| 1.         | 2                                  | 2                                        | Model used in paper              |
| 2.         | 1                                  | 1                                        | Model-free learner               |
| 3.         | 0                                  | 2                                        | Bayesian learner                 |
| 4.         | 2                                  | 1                                        | Single inverse temperature model |
| 5.         | 2                                  | 1                                        | Additional risk parameter        |

513

514 All models were fitted to participant data using the same procedure described in the main paper. BIC  
515 scores for each model are illustrated in figure S1 below (note that lower scores indicate a better fit).  
516 As can be seen the model reported in the main paper (Model 1) fits the data best. The single inverse  
517 temperature model (Model 4) performs almost as well, with the other models performing less well.

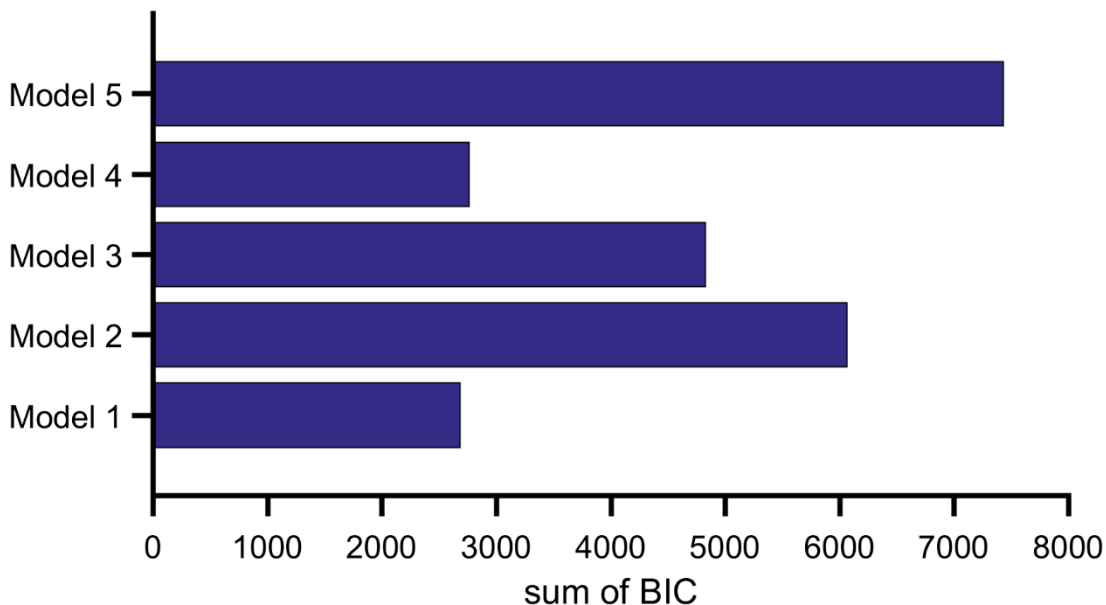

518

519 **Supplementary Figure S1: BIC Scores for Comparator Models (see table S1 for model descriptions).**

520 **Smaller BIC scores indicate a better model fit.**

521

## 522 **Supplementary Results**

### 523 *Switch-Stay Analysis of Behaviour*

524 The IBLT includes both positive and negative outcomes which are independent of each other. As a  
525 result the task contains trials in which both positive and negative outcome encourage the same  
526 behaviour in future trials (e.g. when the win is associated with shape A and the loss with shape B,  
527 both outcomes encourage selection of shape A in the following trial) as well as trials in which the  
528 positive and negative outcomes act in opposition (e.g. when both outcomes are associated with  
529 shape A, then the win outcome encourages selection of shape A in the next trial and the loss  
530 outcome encourages selection of shape B). This second type of trial provides a simple and sensitive  
531 means of assessing how the volatility manipulations alters the impact of win and loss outcomes on  
532 choice behaviour in the task blocks. Specifically an increased influence of win outcomes (e.g. when  
533 wins are volatile) should be associated with:

- 534 a. A decreased tendency to change (shift) choice when both win and loss outcomes are  
535 associated with the chosen shape in the current trial
- 536 b. An increased tendency to change (shift) choice when both win and loss outcomes are  
537 associated with the unchosen shape in the current trial.

538 This analysis does not depend on any formal model and thus can be used to complement the model  
539 based analysis reported in the main paper. We calculated the proportion of shift trials separately for  
540 trials in which both outcomes were associated with the chosen or unchosen shape for each of the  
541 three blocks. Consistent with the model based analysis, participants switched significantly less  
542 frequently when both outcomes were associated with the chosen option in the win relative to loss  
543 informative blocks (Figure S2;  $F(1,27)=6.193$ ,  $p=0.019$ ) and switched significantly more frequently  
544 when both outcomes were associated with the unchosen option in the win relative to loss  
545 informative blocks (Figure S2;  $F(1,27)=4.353$ ,  $p=0.047$ ). This indicates that the results reported in the  
546 main paper are unlikely to be dependent on the exact form of the behavioural model used to derive  
547 the learning rate parameter.

548



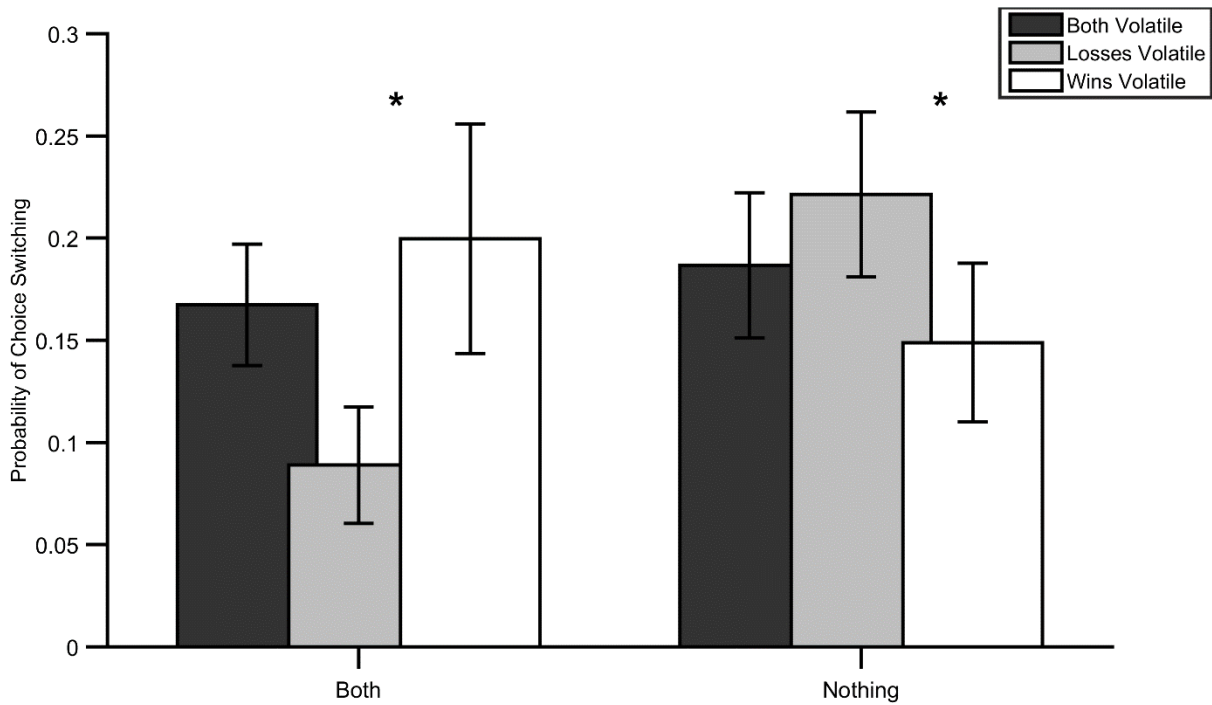

549

550 **Supplementary Figure S2: Analysis of switching behaviour in the IBLT task. The mean (SEM)**  
551 **probability of switching choice in the subsequent trial is plotted separately for trials in which both**  
552 **win and loss outcome are associated with the chosen option (“both”) and the non-chosen option**  
553 **(“nothing”). The columns represent the probability of switching in the first block of the task when**  
554 **both outcomes were informative/volatile (dark columns), in the block in which losses were more**  
555 **informative (grey columns) and the block in which wins were more informative (white column). As**  
556 **can be seen, when wins are more informative than losses (i.e. white bars), participant choice is**  
557 **more influenced by the win relative to loss outcomes than when losses are more informative (grey**  
558 **bars). Specifically, participants are more likely to stick with a choice which has just resulted in both**  
559 **a win and a loss and are more likely to switch to a choice if they didn’t choose it when the wins are**  
560 **informative. \*= $p < 0.05$  for comparison between win informative and loss informative blocks.**

561 *Expected vs Unexpected Uncertainty*

562 When learning, a number of different forms of uncertainty can influence behaviour. One form, which  
563 is sometimes called “unexpected uncertainty”<sup>5</sup> is caused by changes in the associations being  
564 learned (i.e. volatility) and is the main focus of this paper (see main text for a description of how  
565 volatility influences learning). A second form of uncertainty, sometimes called “expected  
566 uncertainty”<sup>5</sup> arises when an association between a stimulus or action and the subsequent outcome  
567 is more or less predictive. For example, this form of uncertainty is lower if an outcome occurs on  
568 90% of the times an action is taken and higher if the outcome occurs on 50% of the time an action is  
569 taken. Normatively, expected uncertainty should influence learning rate—a less predictive  
570 association (i.e. higher expected uncertainty) leads to more random outcomes which tell us less  
571 about the underlying association we are trying to learn, so learners should employ a lower learning  
572 rate when expected uncertainty is higher. In the task described in this paper both the expected and  
573 unexpected uncertainty differ between blocks. Specifically, when an outcome is stable in the task it

574 occurs on 50% of trials, whereas when it is volatile it varies between occurring on 85/15% of trials.  
575 Thus the stable outcome is, at any one time, also less predictable (i.e. noisier) than the volatile  
576 outcome. This task schedule was used as a probability of 50% for the stable outcome improves the  
577 ability of the task to accurately estimate learning rates (it allows more frequent switches in choice).  
578 Further, for the purpose of characterising a potential treatment target the differentiation between  
579 expected and unexpected uncertainty is relatively unimportant as both forms of uncertainty would  
580 be expected to reduce learning rate in the stable blocks and increase it in the volatile block of the  
581 task. However, this aspect of the task raises the possibility that the observed effects on behaviour  
582 described in the main paper may arise secondary to differences in expected uncertainty (noise)  
583 rather than the unexpected uncertainty (volatility) manipulation. In order to test this possibility we  
584 developed a similar learning task in which volatility was kept constant and expected uncertainty was  
585 varied (Figure S4). In this task, participants again had to choose between two shapes in order to win  
586 as much money as possible, however on each trial 100 “win points” and 100 “loss points” were  
587 divided between the two shapes and participants received money proportional to the number of win  
588 points – loss points of their chosen option. Thus, a win and loss outcome occurred on every trial of  
589 this task, but the magnitude of these outcomes varied. During the task, participants had to learn the  
590 expected magnitude of wins and losses for the shapes rather than the probability of their  
591 occurrence. This design (Figure S4a) allowed us present participants with schedules in which the  
592 volatility (i.e. unexpected uncertainty) of win and loss magnitudes was constant but the noise  
593 (expected uncertainty) varied (Figure S4b). Otherwise the task was structurally identical to the IBLT  
594 with 240 trials split into 3 blocks. We recruited a separate cohort of 30 healthy participants who  
595 completed this task and then estimated their learning rate using a model which was structurally  
596 identical (i.e. 2 learning rates and 2 inverse temperature parameters) to that used in the main paper  
597 (Model 1). As can be seen (Figure S4c), there was no effect of expected uncertainty on participant  
598 learning rate (block information x parameter valence;  $F(1,28)=1.97$ ,  $p=0.17$ ) during this task. This  
599 suggests that the learning rate effect seen in the IBLT cannot be accounted for by differences in  
600 expected uncertainty and therefore is likely to have arisen due to the unexpected uncertainty  
601 (volatility) manipulation. Inverse decision temperature did differ between block ( $F(1,28)=5.56$ ,  
602  $p=0.026$ ). As can be seen in Figure S4d, there was a significantly higher win inverse temperature  
603 during the block in which the losses had lower noise ( $F(1,28)=9.26$ ,  $p=0.005$ ) and when compared to  
604 the win inverse temperature when wins had lower noise ( $F(1,28)=5.35$ ,  $p=0.028$ ), but no equivalent  
605 effect for loss inverse temperature. These results suggest that, if anything, participants were more  
606 influenced by noisy outcomes.

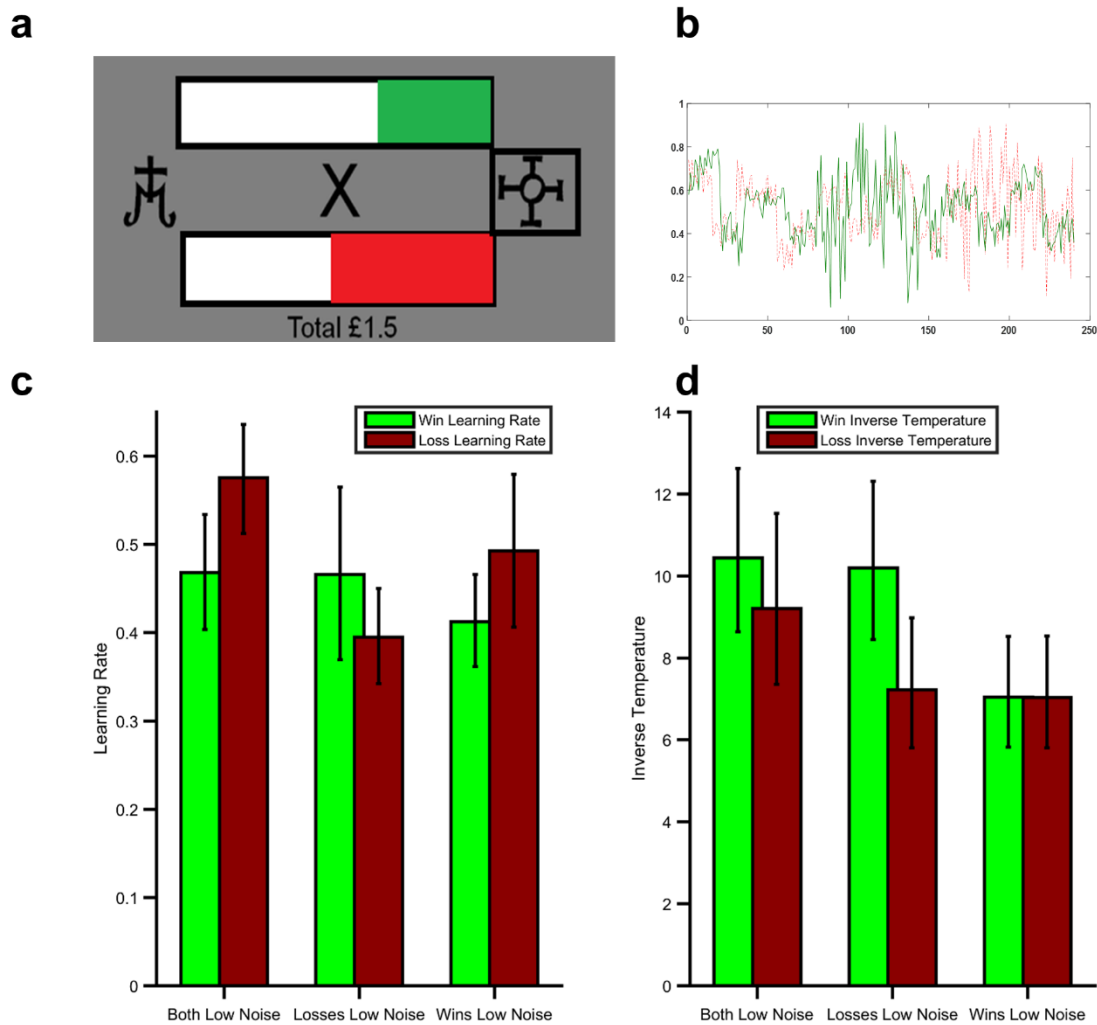

607

608 **Figure S4: Magnitude Task. A) example outcome screen from the task. Participants chose between**  
609 **two shapes. Each shape, if chosen, resulted in winning a proportion of 100 win points (bar on top**  
610 **of fixation cross with green fill) and losing a proportion of 100 loss points (bar under fixation**  
611 **cross with red fill), with participants receiving the difference between the two. B) The task schedule**  
612 **for win (green) and loss (red) magnitudes included 3 blocks; in the first block both outcomes had**  
613 **low expected uncertainty (noise), in the last two blocks one outcome had high and the other low**  
614 **expected uncertainty. The volatility of the outcomes was constant across blocks. C) Participants**  
615 **did not significantly adjust their learning rates in response to expected uncertainty and D) inverse**  
616 **temperature for wins was increased during the block in which the losses had lower noise, with no**  
617 **effect on loss inverse temperature.**

618

#### 619 *Regression Analysis of Pupil Data*

620 The analysis of pupil data reported in the main text examines the effect of block information content  
621 (i.e. win volatile vs. loss volatile) and outcome receipt on the pupil response to win and loss  
622 outcomes. However a number of other factors may also influence pupil dilation such as the order in  
623 which the outcomes were presented and the surprise associated with the outcome<sup>1</sup>. In order to

624 ensure that these additional factors could not account for our findings we ran a regression analysis  
625 of the pupil data from the IBLT task. In this analysis we derived, for each participant, trialwise  
626 estimates of the outcome volatility and outcome surprise of the chosen option using the Ideal  
627 Bayesian Observer reported by Behrens et al.<sup>2</sup>. These estimates were entered as explanatory  
628 variables alongside variables coding for outcome order (i.e. win displayed first or second), outcome  
629 of the trial (outcome received or not) and an additional term coding for the interaction between the  
630 outcome volatility and outcome of the trial (i.e. analogous to the pupil effect reported in Figure 3 of  
631 the main paper). Separate regression analyses were run for each 2ms timepoint across the outcome  
632 period, for win and loss outcomes and for each participant. This resulted in timeseries of beta  
633 weights representing the impact of each explanatory factor, for each participant and for win and loss  
634 outcomes. As can be seen in Figure S5 below, consistent with the results reported in the paper this  
635 analysis revealed a significant volatility x outcome interaction for loss outcomes ( $F(1,27)=6.249$ ,  $p =$   
636  $0.019$ ), with no effect for wins ( $F(1,27)=0.215$ ,  $p = 0.646$ ). This result indicates that pupil effects  
637 reported in the main paper are not the result of outcome order or surprise effects on pupil dilation.

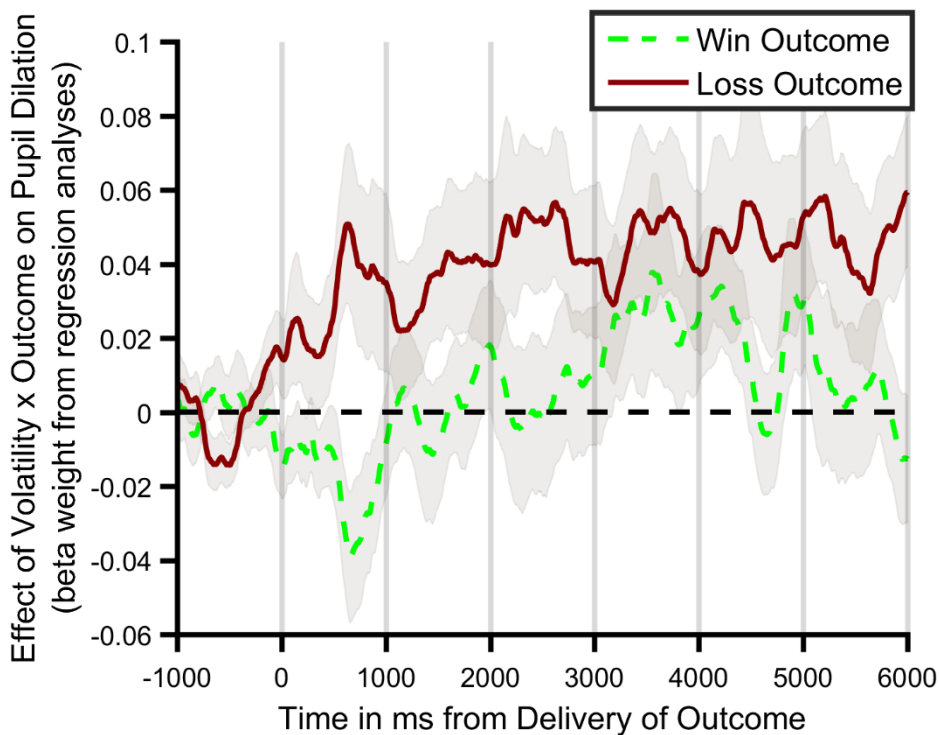

638

639 **Supplementary Figure S5. Regression analysis of pupil data. The mean (SEM) beta weight of the**  
640 **volatility x outcome regressor of the regression analysis of the pupil data is shown separately for**  
641 **win (green) and loss (red) outcomes. The loss regressor differs significantly from 0 for the loss**  
642 **outcomes indicating that, across participants, pupil dilation was greater in response to an**  
643 **outcome in the volatile than stable block for losses. No significant effect was observed for win**  
644 **outcomes.**

645

646 *Post-Hoc Analysis of Pupil Data*

647 Figure 3 from the paper illustrates the difference in pupil dilation between trials in which an  
648 outcome was received and those in which the outcome was not received. In order to further  
649 investigate this effect Figure S6 below separately plots the mean pupil response for trials in which  
650 the outcome was and was not received. As can be seen, whereas there is relatively little difference in  
651 pupil response during the win trials, there is a large difference in dilation between trials on which a  
652 loss is received and those in which no loss is received. Further, the effect of loss volatility is seen to  
653 both increase dilation on receipt of a loss and reduce dilation when no loss is received, suggesting  
654 that the effect of the volatility manipulation is to exaggerate the effect of the outcome.

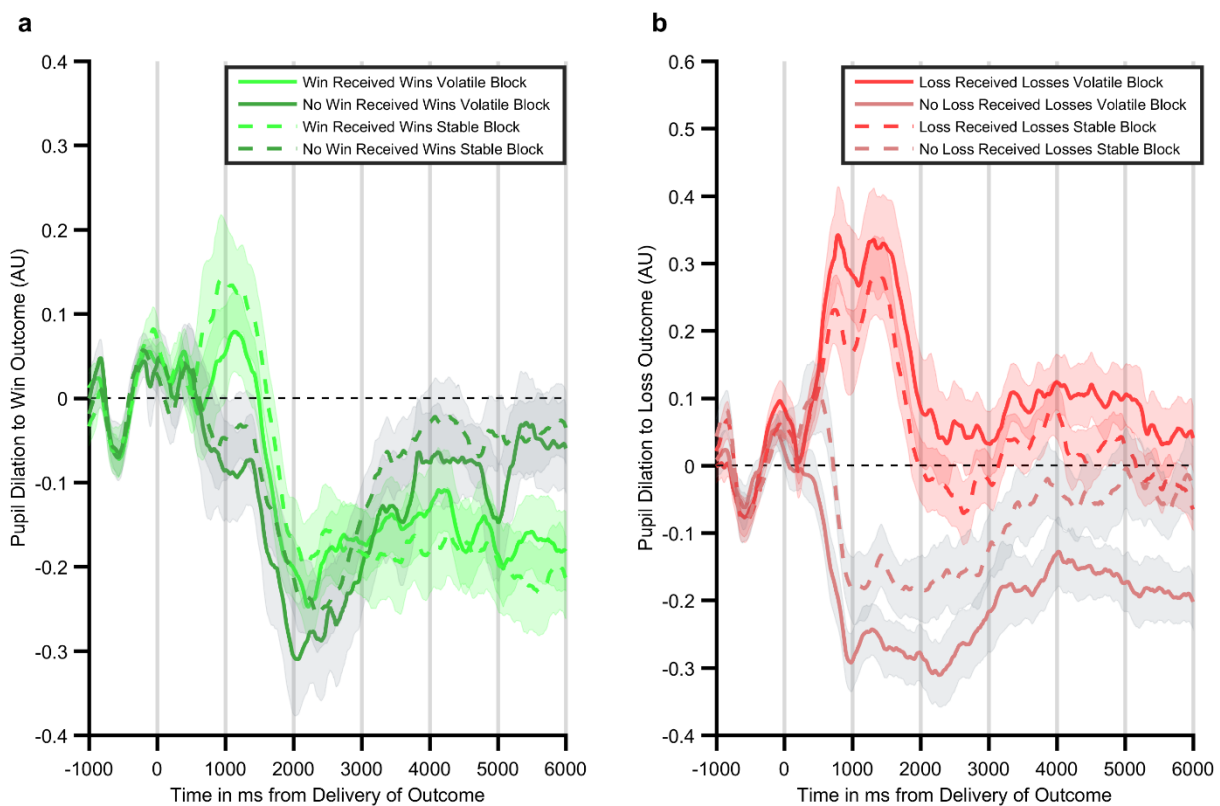

655

656 **Supplementary Figure S6. Individual time courses for trials in which wins (panel a) and losses**  
657 **(panel b) are either received or not received. Lines represent the mean and shaded areas the SEM**  
658 **of pupil dilation over the 6 seconds after outcomes are presented.**

659 *Relationship Between Baseline Symptoms of Anxiety and Depression and Task Outcomes*

660 Although participants in the current study were not selected on the basis of their symptoms of  
661 depression or anxiety, baseline questionnaires were completed allowing assessment of the  
662 relationship between symptoms and task performance. Consistent with previous work<sup>1</sup> symptoms of  
663 anxiety, measured using the trait-STAI and depression, measured using the QIDS, correlated  
664 significantly negatively with differential pupil response to losses (all  $r < -0.43$ , all  $p < 0.02$ ). That is, the

665 higher the symptom score, the less pupil dilation differed between the loss informative and loss non-  
666 informative blocks. These measures did not correlate with pupil response to wins (all  $p > 0.2$ ). A  
667 marginal correlation was found between trait-STAI and the change in learning rate to losses, with  
668 participants with higher scores adjusting their learning rate less than those with a lower score ( $r =$   
669  $0.34$ ,  $p = 0.07$ ). We did not observe any relationship between either questionnaire measure and  
670 change in the win learning rate or between QIDS score and change in loss learning rate (all  $p > 0.2$ ).

671

## 672 **Supplementary References**

- 673 1 Browning M, Behrens TE, Jocham G, O'Reilly JX, Bishop SJ. Anxious individuals have difficulty  
674 learning the causal statistics of aversive environments. *Nat Neurosci* 2015; **18**: 590–596.
- 675 2 Behrens TEJ, Woolrich MW, Walton ME, Rushworth MFS. Learning the value of information in an  
676 uncertain world. *Nat Neurosci* 2007; **10**: 1214–1221.
- 677 3 Behrens TE, Hunt LT, Woolrich MW, Rushworth MF. Associative learning of social value. *Nature*  
678 2008; **456**: 245–9.
- 679 4 Daw ND, Gershman SJ, Seymour B, Dayan P, Dolan RJ. Model-based influences on humans'  
680 choices and striatal prediction errors. *Neuron* 2011; **69**: 1204–1215.
- 681 5 Yu AJ, Dayan P. Uncertainty, neuromodulation, and attention. *Neuron* 2005; **46**: 681–92.

682

683
